# Supplementary material
Source: MDPI journal article supplement (https://www.mdpi.com/1424-2818/13/5/216)

# Supplemental Information Table S1

**Table S1. List of *Sphaerotheca* species used in the present study, including sample ID or voucher numbers, sample localities and GenBank accession numbers. Locality identifier (no) refer to the Fig. 1. Coordinates are given in decimal degrees. § = sample of photographed specimen (see Fig. 1).**

| no | Clade                   | Sample ID/voucher  | Source                         | Locality                                                                                                | NCBI     | N       | E       |
|----|-------------------------|--------------------|--------------------------------|---------------------------------------------------------------------------------------------------------|----------|---------|---------|
| 1  | <i>dobsonii</i>         | BNHS 6010          | Padhye et al. 2017             | Bankot-Mandangad Road, Maharashtra                                                                      | KY215974 | 17.9801 | 73.0649 |
| 2  | <i>dobsonii</i>         | INHER-Amphibia-86  | Padhye et al. 2017             | Tamhini, Pune, Maharashtra                                                                              | KY215970 | 18.4773 | 73.4267 |
| 3  | <i>dobsonii</i>         | WILD-16-AMP-651    | Padhye et al. 2017             | Devi Hasool, Maharashtra                                                                                | KY215971 | 16.7415 | 73.4320 |
| 4  | <i>dobsonii</i>         | BNHS 6008          | Padhye et al. 2017             | Devi Hasool, Maharashtra                                                                                | KY215972 | 16.7415 | 73.4320 |
| 5  | <i>dobsonii</i>         | -                  | Hasan et al. 2014              | Bajpe, Mangalore, Karnataka                                                                             | AB530608 | 12.9842 | 74.8813 |
| 6  | <i>dobsonii</i>         | -                  | Padhye et al. 2017             | India, Bankot, Maharashtra                                                                              | KY215973 | 17.9793 | 73.0487 |
| 7  | <i>dobsonii</i>         | -                  | Padhye et al. 2017             | India, Tamhini, Pune, Maharashtra                                                                       | KY215969 | 18.4469 | 73.4305 |
| 8  | <i>dobsonii</i>         | -                  | Kotaki et al. 2008             | Bajpe, Mangalore, Karnataka                                                                             | AB277305 | 12.9842 | 74.8813 |
| 9  | <i>ptinialis</i>        | INHER-Amphibia-180 | Dandekar et al. 2020           | Wadala Tukam near Tadoba, Chandrapur, Maharashtra                                                       | MT773262 | 20.3000 | 79.2620 |
| 10 | <i>ptinialis</i>        | ZSI A9074          | Vences et al. 2000             | Pattaravakkam Hill, Tamil Nadu                                                                          | AF215418 | 12.6960 | 80.0300 |
| 11 | <i>ptinialis</i>        | ZSI 2681           | Bossuyt et al. 2000            | Sri Lanka                                                                                               | AF249042 | 07.8731 | 80.7718 |
| 12 | <i>Sphaerotheca</i> sp. | -                  | Mulcahy et al. 2018            | Myanmar, Sagaing, Chathin, ca. 2 km WNW of Chathin Wildlife Sanctuary, San Mying camp, Kanbalu Township | MG935992 | 23.5744 | 95.7378 |
| 13 | <i>Sphaerotheca</i> sp. | -                  | Mulcahy et al. 2018            | Myanmar                                                                                                 | MG935993 | 21.9162 | 95.9560 |
| 14 | <i>Sphaerotheca</i> sp. | -                  | Vences et al. 2000             | Myanmar                                                                                                 | AF215417 | 21.9162 | 95.9560 |
| 15 | <i>Sphaerotheca</i> sp. | -                  | Delorme et al. 2004            | Myanmar                                                                                                 | AY880442 | 21.916  | 95.9560 |
| 16 | <i>breviceps</i>        | WILD-16-AMP-645    | Padhye et al. 2017             | Tanquebar, Tamil Nadu                                                                                   | KY215978 | 11.0621 | 79.8128 |
| 17 | <i>breviceps</i>        | BNHS 6005          | Padhye et al. 2017             | Tanquebar, Tamil Nadu                                                                                   | KY215977 | 11.0621 | 79.8128 |
| 18 | <i>breviceps</i>        | BNHS 6006          | Padhye et al. 2017             | Mathon, Jharkhand                                                                                       | KY215975 | 23.7758 | 86.8092 |
| 19 | <i>breviceps</i>        | WILD-16-AMP-647    | Padhye et al. 2017             | Mathon, Jharkhand                                                                                       | KY215976 | 23.7758 | 86.8092 |
| 20 | <i>breviceps</i>        | ZSI/WRC/2179       | Prasad et al. 2019             | Kodema, Jharkhand                                                                                       | MK694738 | 24.4180 | 85.4680 |
| 21 | <i>breviceps</i>        | INHER-Amphibia-189 | Dandekar et al. 2020           | Bramhapuri, Chandrapur, Maharashtra                                                                     | MT773258 | 20.6237 | 79.8473 |
| 22 | <i>breviceps</i>        | INHER-Amphibia-191 | Dandekar et al. 2020           | Bramhapuri, Chandrapur, Maharashtra                                                                     | MT773259 | 20.6237 | 79.8473 |
| 23 | <i>maskei</i>           | 9470 <sup>§</sup>  | this study                     | Pakistan                                                                                                | MW676044 | 34.7300 | 72.0900 |
| 24 | <i>maskei</i>           | 9471               | this study                     | Pakistan                                                                                                | MW676045 | 34.7200 | 72.1000 |
| 25 | <i>maskei</i>           | BNHS 6014          | Padhye et al. 2017             | Talekhar, near the Phansad WLS                                                                          | KY215984 | 18.4700 | 72.9900 |
| 26 | <i>maskei</i>           | WILD-16-AMP-658    | Dandekar et al. 2020           | Talekhar, near the Phansad WLS                                                                          | MT798141 | 18.4700 | 72.9900 |
| 27 | <i>maskei</i>           | BNHS 6016          | Padhye et al. 2017             | Wada, Thane, Maharashtra                                                                                | KY215986 | 19.6870 | 73.0000 |
| 28 | <i>maskei</i>           | BNHS 6013          | Padhye et al. 2017             | Kolad, Raigad, Maharashtra                                                                              | KY215983 | 18.4037 | 73.3213 |
| 29 | <i>maskei</i>           | WILD-16-AMP-657    | Dandekar et al. 2020           | Kolad, Raigad, Maharashtra                                                                              | MT798140 | 18.4037 | 73.3213 |
| 30 | <i>maskei</i>           | WILD-16-AMP-644    | Padhye et al. 2017             | Tamhini, Pune                                                                                           | KY215994 | 18.4773 | 73.4267 |
| 31 | <i>maskei</i>           | BNHS 6003          | Padhye et al. 2017             | Ahwa, Gujarat                                                                                           | KY215992 | 20.7644 | 73.6757 |
| 32 | <i>maskei</i>           | WILD-16-AMP-643    | Padhye et al. 2017             | Ahwa, Gujarat                                                                                           | KY215993 | 20.7644 | 73.6757 |
| 33 | <i>maskei</i>           | BNHS 6018          | Padhye et al. 2017             | Waghai-Ahwa Road, Dang, Gujarat                                                                         | KY215988 | 20.7090 | 73.7090 |
| 34 | <i>maskei</i>           | INHER-Amphibia-175 | Dandekar et al. 2020           | Pune City, Maharashtra                                                                                  | MT773254 | 18.4871 | 73.7741 |
| 35 | <i>maskei</i>           | BNHS 6015          | Padhye et al. 2017             | Akole, Sangamner, Maharashtra                                                                           | KY215985 | 19.5180 | 73.9230 |
| 36 | <i>maskei</i>           | BNHS 6019          | Padhye et al. 2017             | Ahwa-Chinchli Road, Dang, Gujarat                                                                       | KY215989 | 20.7650 | 73.9720 |
| 37 | <i>maskei</i>           | WILD-16-AMP-642    | Padhye et al. 2017             | Saswad, Pune, Maharashtra                                                                               | KY215991 | 18.3075 | 74.0830 |
| 38 | <i>maskei</i>           | BNHS 6012          | Padhye et al. 2017             | Near Yellapur, Karnataka                                                                                | KY215981 | 14.9799 | 74.7314 |
| 39 | <i>maskei</i>           | ZSI-WRC A/1550     | Padhye et al. 2017             | Near Yellapur, Karnataka                                                                                | KY215982 | 14.9799 | 74.7314 |
| 40 | <i>maskei</i>           | WILD-16-AMP-656    | Dandekar et al. 2020           | Near Yellapur, Karnataka                                                                                | MT798139 | 14.9799 | 74.7314 |
| 41 | <i>maskei</i>           | ZSI-WRC A/1549     | Padhye et al. 2017             | Yellapur-Halliyal Rd., Karnataka                                                                        | KY215980 | 15.1602 | 74.7587 |
| 42 | <i>maskei</i>           | BNHS 6011          | Padhye et al. 2017             | Dharwad-Halliyal-Yellapur Rd., Karnataka                                                                | KY215979 | 15.3494 | 74.8675 |
| 43 | <i>maskei</i>           | WILD-16-AMP-655    | Dandekar et al. 2020           | Dharwad-Halliyal-Yellapur Rd., Karnataka                                                                | MT798138 | 15.3494 | 74.8675 |
| 44 | <i>maskei</i>           | WILD-16-AMP-641    | Padhye et al. 2017             | Rehekuri WLS, Maharashtra                                                                               | KY215990 | 18.5982 | 74.9742 |
| 45 | <i>maskei</i>           | INHER-Amphibia-236 | Dandekar et al. 2020           | Chikhaldara, Melghat, Maharashtra                                                                       | MT773255 | 21.4183 | 77.3157 |
| 46 | <i>maskei</i>           | Sb31HNBGU          | Choudhary et al. 2017, unpubl. | Chandrabani, Dehradun, Uttarakhand                                                                      | KX815435 | 30.2848 | 77.9737 |
| 47 | <i>maskei</i>           | Sb32HNBGU          | Choudhary et al. 2017, unpubl. | Chandrabani, Dehradun, Uttarakhand                                                                      | KX815436 | 30.2848 | 77.9737 |
| 48 | <i>maskei</i>           | SbHR25HNBGU        | Choudhary et al. 2017, unpubl. | Jageshpur, Haridwar, Uttarakhand                                                                        | KX815437 | 29.9189 | 78.1262 |
| 49 | <i>maskei</i>           | Sb27HNBGU          | Choudhary et al. 2017, unpubl. | Jageshpur, Haridwar, Uttarakhand                                                                        | KX815438 | 29.9189 | 78.1262 |
| 50 | <i>maskei</i>           | INHER-Amphibia-240 | Dandekar et al. 2020           | Pandharkawda, Maharashtra                                                                               | MT773256 | 20.0962 | 78.5322 |
| 51 | <i>maskei</i>           | INHER-Amphibia-239 | Dandekar et al. 2020           | Pandharkawda, Maharashtra                                                                               | MT773257 | 20.0962 | 78.5322 |
| 52 | <i>maskei</i>           | SbSG17HNBGU        | Choudhary et al. 2017, unpubl. | Ravadi, Uttarakhand                                                                                     | KX815440 | 30.2218 | 78.7843 |
| 53 | <i>maskei</i>           | SbJH1HNBGU         | Choudhary et al. 2017, unpubl. | Joshimath, Uttarakhand                                                                                  | KX815439 | 30.5544 | 79.5664 |
| 54 | <i>maskei</i>           | INHER-Amphibia-194 | Dandekar et al. 2020           | Maregaon, Chandrapur, Maharashtra                                                                       | MT773260 | 20.2579 | 79.7566 |
| 55 | <i>maskei</i>           | INHER-Amphibia-201 | Dandekar et al. 2020           | Ekara, Chandrapur, Maharashtra                                                                          | MT773261 | 20.3822 | 79.8102 |
| 56 | <i>maskei</i>           | WIADA225           | Prasad et al. 2020             | Panna Tiger Reserve, Madhya Pradesh                                                                     | MN741157 | 24.6300 | 79.9737 |
| 57 | <i>maskei</i>           | WIADA232           | Prasad et al. 2020             | Panna Tiger Reserve, Madhya Pradesh                                                                     | MN741158 | 24.6300 | 79.9737 |
| 58 | <i>maskei</i>           | BNHS 6017          | Padhye et al. 2017             | Salher Fort Road, Maharashtra                                                                           | KY215987 | 20.7470 | 73.9730 |
| 59 | <i>bengaluru</i>        | ZSI/WRS/A/2285     | Deepak et al. 2020             | Bengaluru, Karnataka                                                                                    | MW077539 | 13.1876 | 77.5253 |
| 60 | <i>maskei</i>           | CDZMTU423          | Kathiwada et al. 2021          | Ghyalchok, Gorkha, Nepal                                                                                | MT983173 | ~27.81  | ~84.75  |
| 61 | <i>maskei</i>           | CDZMTU424          | Kathiwada et al. 2021          | Ghyalchok, Gorkha, Nepal                                                                                | MT983174 | ~27.81  | ~84.75  |
| 62 | <i>maskei</i>           | CDZMTU425          | Kathiwada et al. 2021          | Hattibang, Chitwan, Nepal                                                                               | MT983175 | ~27.73  | ~84.61  |
| 63 | <i>maskei</i>           | CDZMTU426          | Kathiwada et al. 2021          | ?                                                                                                       | MT983176 | -       | -       |
| 64 | <i>maskei</i>           | CDZMTU427          | Kathiwada et al. 2021          | ?                                                                                                       | MT983177 | -       | -       |
| 65 | <i>maskei</i>           | CDZMTU428          | Kathiwada et al. 2021          | ?                                                                                                       | MT983178 | -       | -       |
| 66 | <i>maskei</i>           | CDZMTU429          | Kathiwada et al. 2021          | ?                                                                                                       | MT983179 | -       | -       |
| 67 | <i>maskei</i>           | CDZMTU430          | Kathiwada et al. 2021          | ?                                                                                                       | MT983180 | -       | -       |
| 68 | <i>maskei</i>           | CDZMTU431          | Kathiwada et al. 2021          | ?                                                                                                       | MT983181 | -       | -       |
| 69 | <i>maskei</i>           | CDZMTU432          | Kathiwada et al. 2021          | ?                                                                                                       | MT983182 | -       | -       |
| 70 | <i>maskei</i>           | CDZMTU433          | Kathiwada et al. 2021          | Hattibang, Chitwan, Nepal                                                                               | MT983183 | ~27.73  | ~84.61  |
| 71 | <i>maskei</i>           | CDZMTU434          | Kathiwada et al. 2021          | ?                                                                                                       | MT983184 | -       | -       |
| 72 | <i>maskei</i>           | CDZMTU435          | Kathiwada et al. 2021          | ?                                                                                                       | MT983185 | -       | -       |
| 73 | <i>maskei</i>           | CDZMTU436          | Kathiwada et al. 2021          | ?                                                                                                       | MT983186 | -       | -       |
| 74 | <i>maskei</i>           | CDZMTU437          | Kathiwada et al. 2021          | ?                                                                                                       | MT983187 | -       | -       |
| 75 | <i>maskei</i>           | CDZMTU438          | Kathiwada et al. 2021          | ?                                                                                                       | MT983188 | -       | -       |
| 76 | <i>maskei</i>           | CDZMTU439          | Kathiwada et al. 2021          | ?                                                                                                       | MT983189 | -       | -       |
| 77 | <i>maskei</i>           | CDZMTU440          | Kathiwada et al. 2021          | ?                                                                                                       | MT983190 | -       | -       |
| 78 | <i>maskei</i>           | CDZMTU441          | Kathiwada et al. 2021          | ?                                                                                                       | MT983191 | -       | -       |
| 79 | <i>maskei</i>           | CDZMTU442          | Kathiwada et al. 2021          | Chhintang, Dhankuta, Nepal                                                                              | MT983192 | ~26.91  | ~87.16  |
| 80 | <i>breviceps</i>        | CDZMTU443          | Kathiwada et al. 2021          | Dharan (Jabdi), Sunsari district, Nepal                                                                 | MT983193 | ~26.67  | ~87.19  |
| 81 | <i>breviceps</i>        | CDZMTU444          | Kathiwada et al. 2021          | Dharan (Jabdi), Sunsari district, Nepal                                                                 | MT983194 | ~26.67  | ~87.19  |
| 82 | <i>breviceps</i>        | CDZMTU445          | Kathiwada et al. 2021          | Dharan (Jabdi), Sunsari district, Nepal                                                                 | MT983195 | ~26.67  | ~87.19  |
| 83 | <i>maskei</i>           | [rolandae]         | Sharma et al. 2009, unpubl.    | unknown                                                                                                 | GU191122 | -       | -       |

## References:

- Bossuyt, F.; Milinkovitch, M.C. Convergent adaptive radiations in Madagascan and Asian ranid frogs reveal covariation between larval and adult traits. *Proceedings of the National Academy of Sciences of the United States of America*, 2000, 97 (12), 6585-6590.
- Dandekar, N.; Sulakhe, S.; Padhye, A. Range extension of the western burrowing frog, *Sphaerotheca pashchima* (Anura: Dicroglossidae), in Central and Northern India, with an overview of the distribution of other Indian species in the genus *Sphaerotheca*. *Reptiles & Amphibians* 2020, 27 (3), 390–396.
- Delorme, M.; Dubois, A.; Kosuch, J.; Vences, M. Molecular phylogenetic relationships of *Lankanectes corrugatus* from Sri Lanka: endemism of South Asian frogs and the concept of monophyly in phylogenetic studies. *Alytes* 2004, 22 (1-2), 53-64.
- Deepak, P.; Dinesh, K.P.; Prasad, K.V.; Das, A.; Ashadevi, J.S. Distribution status of the Western Burrowing Frog, *Sphaerotheca pashchima* in India. *Zootaxa* 2020, 4894 (1), 146–150, doi: 10.11646/zootaxa.4894.1.10.
- Hasan, M.; Islam, M.M.; Khan, M.R.; Igawa, T.; Alam, M.S.; Djong, H.T.; Kurniawan, N.; Joshy, H.; Sen, Y.H., Belabut, D.M.; Kurabayashi, A.; Kuramoto, M.; Sumida, M. Genetic divergences of South and Southeast Asian frogs: a case study of several taxa based on 16S ribosomal RNA gene data with notes on the generic name *Fejervarya*. *Turkish Journal of Zoology*, 2014, 38 (4):1-22.
- Khatiwada, J.R.; Wang, B.; Zhao, T.; Xie, F.; Jiang, J. An integrative taxonomy of amphibians of Nepal: an updated status and distribution. *Asian Herpetological Research* 2021, 12 (1), 1-35. doi: 10.16373/j.cnki.ahr.200050
- Kotaki, M.; Kurabayashi, A.; Matsui, M.; Khonsue, W.; Djong, T.H.; Tandon, M.; Sumida, M. Genetic divergences and phylogenetic relationships among the *Fejervarya limnocharis* complex in Thailand and neighboring countries revealed by mitochondrial and nuclear genes. *Zoological Science*, 2008, 25 (4), 381-390.
- Mulcahy, D.G.; Lee, J.L.; Miller, A.H.; Chand, M.; Kyaw Thura, M.; Zug, G.R. Filling the BINs of Life: Report of an amphibian and reptile survey of the Tanintharyi (Tenasserim) Region of Myanmar, with DNA barcode data. *ZooKeys* 2018, 757, 85-152. doi: 10.3897/zookeys.757.24453
- Padhye, A.; Dahanukar, N.; Sulakhe, S.; Dandekar, N.; Limaye, S.; Jamdade, K. *Sphaerotheca pashchima*, a new species of bur-rowing frog (Anura: Dicroglossidae) from western India. *Journal of Threatened Taxa* 2017, 9 (6), 10286–10296, doi: 10.11609/jott.2877.9.6.10286-10296.
- Prasad, V.K.; Dinesh, K.P.; Das, A.; Swamy, P.; Shinde, A.D.; Vishnu, J.B. A new species of *Sphaerotheca* Gunther, 1859 (Amphibia: Anura: Dicroglossidae) from the agro ecosystems of Chota Nagpur Plateau, India. *Records of Zoological Survey of India* 2019, 119 (3), 197–210, doi: 10.26515/rzsi/v119/i3/2019/132173.
- Vences, M.; Glaw, F.; Kosuch, J.; Das, I.; Veith, M. Phylogenetic studies of ranoid frogs (Amphibia: Anura), with a discussion of the origin and evolution of the vertebrate clades of Madagascar. In: Lourenco, W.R.; Goodman, S.M. (Eds.); *Diversite et Endemisme de Madagascar*, 1999, 229-242; *Memoires de la Societe de Biogeographie*, Paris, France.

# Supplemental Information Figure S1

**Figure S1.** Maximum-likelihood tree of the genus *Sphaerotheca* with main detected clades. The details on the geographic distribution of detected clades you can see on Fig. 2. Colors correspond with clades showed on Fig. 3. Rectangles at branch nodes refer to bootstrap values  $\geq 75$ .

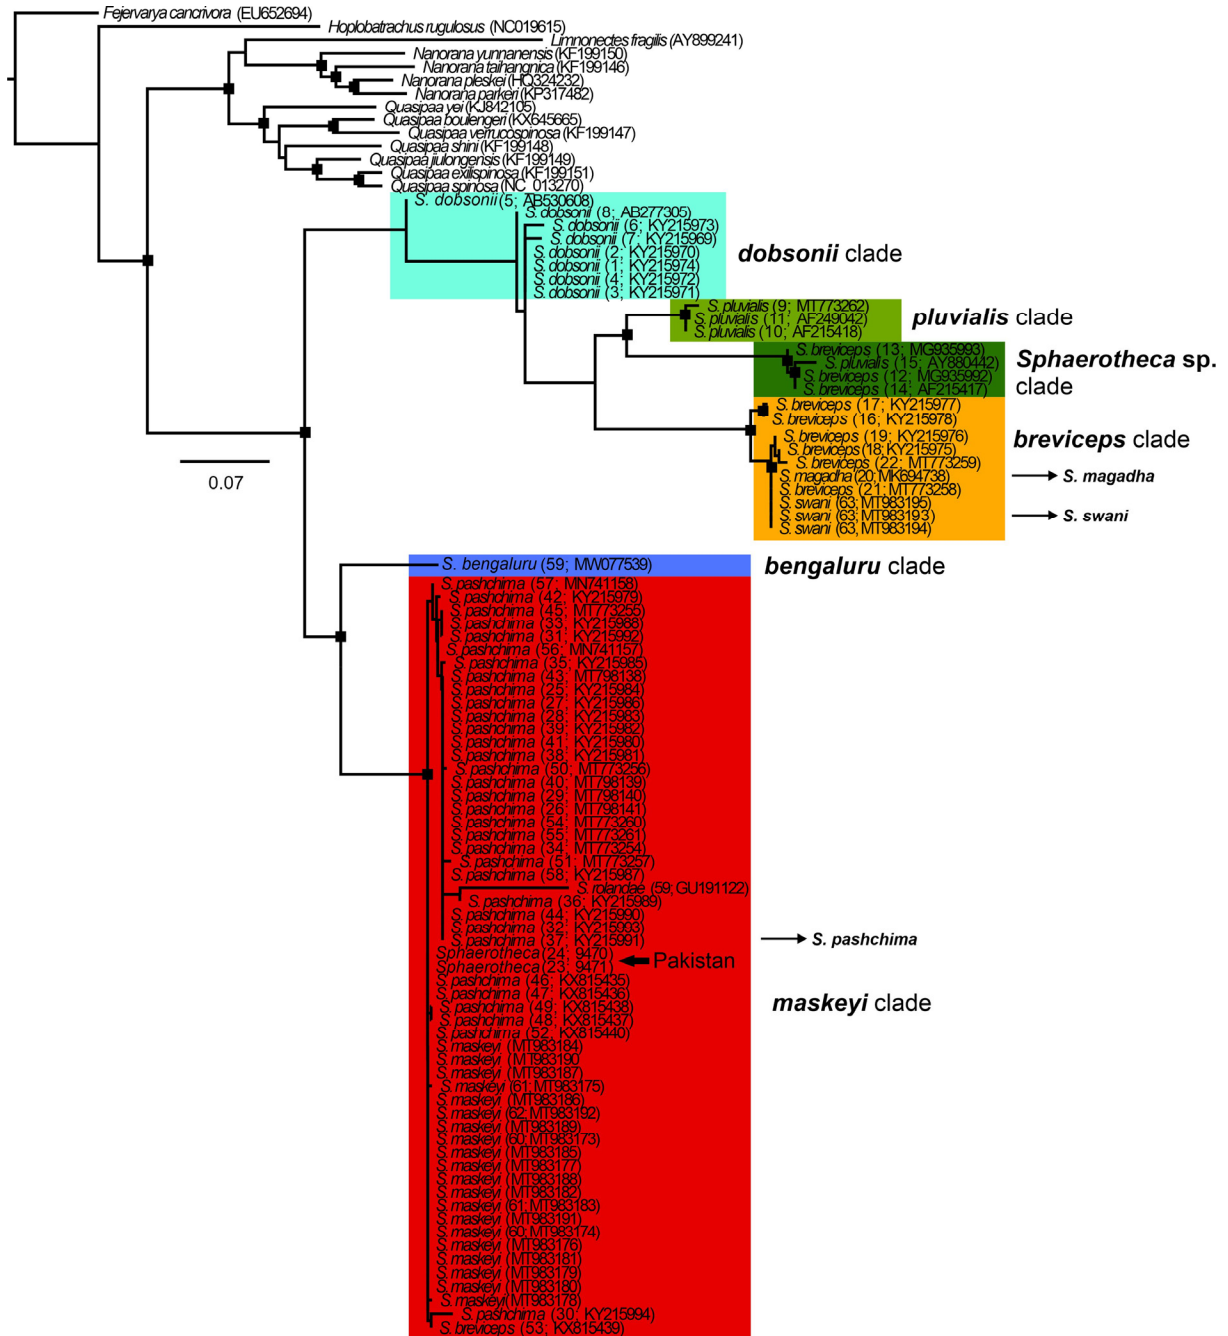

### Supplemental Information Figure S2

**Figure S2.** Principal Component Analysis (PCA) of defined clades of *Sphaerotheca* genus with suggested taxonomic affiliation showing inter- and intra-clade distances. The oval outlines in PCA represent 95% confidence intervals. First (PC1) and second (PC2) principal components explain 18.4% and 13.9% of the observed variance.

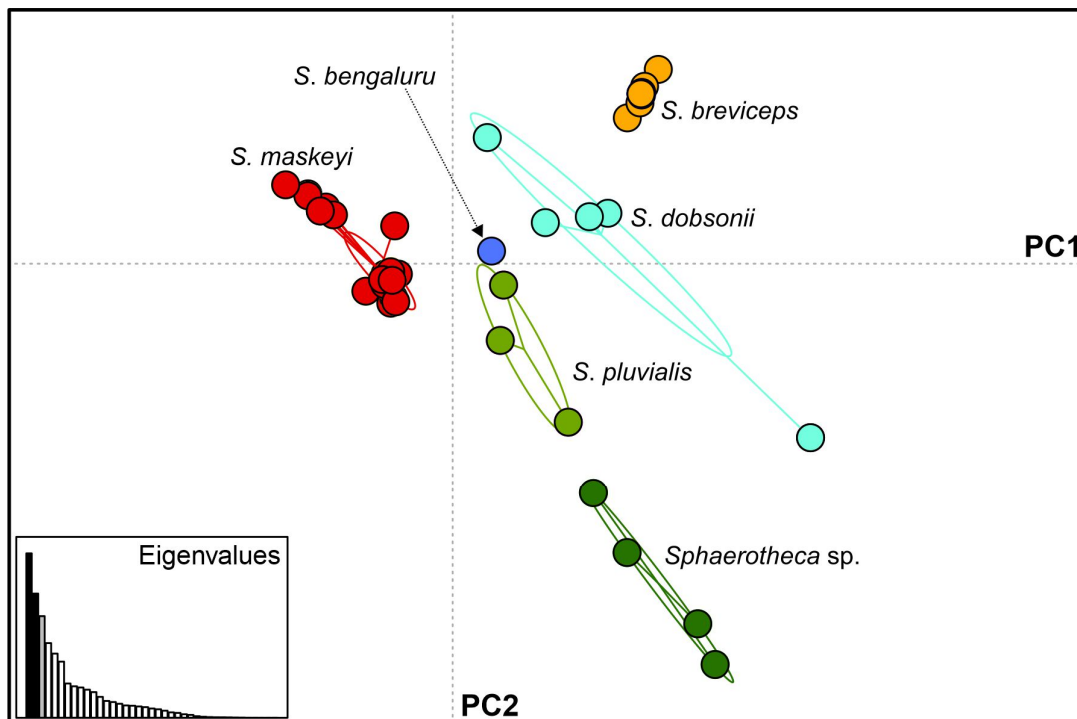

Supplement: s1 [file s1]
